# Supplementary material for: The primacy of dissolved organic matter to aquatic light variability
Source: Copernicus journal article supplement (doi:10.5194/bg-22-4367-2025), 2025-09-04
Supplement: Supplementary file 1 [file bg-22-4367-2025-supplement.pdf]

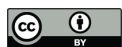

## *Supplement of*

# **The primacy of dissolved organic matter to aquatic light variability**

**Henry F. Houskeeper and Stanford B. Hooker**

*Correspondence to:* Henry F. Houskeeper ([henry.houskeeper@who.edu](mailto:henry.houskeeper@who.edu))

The copyright of individual parts of the supplement might differ from the article licence.

Figure S1.

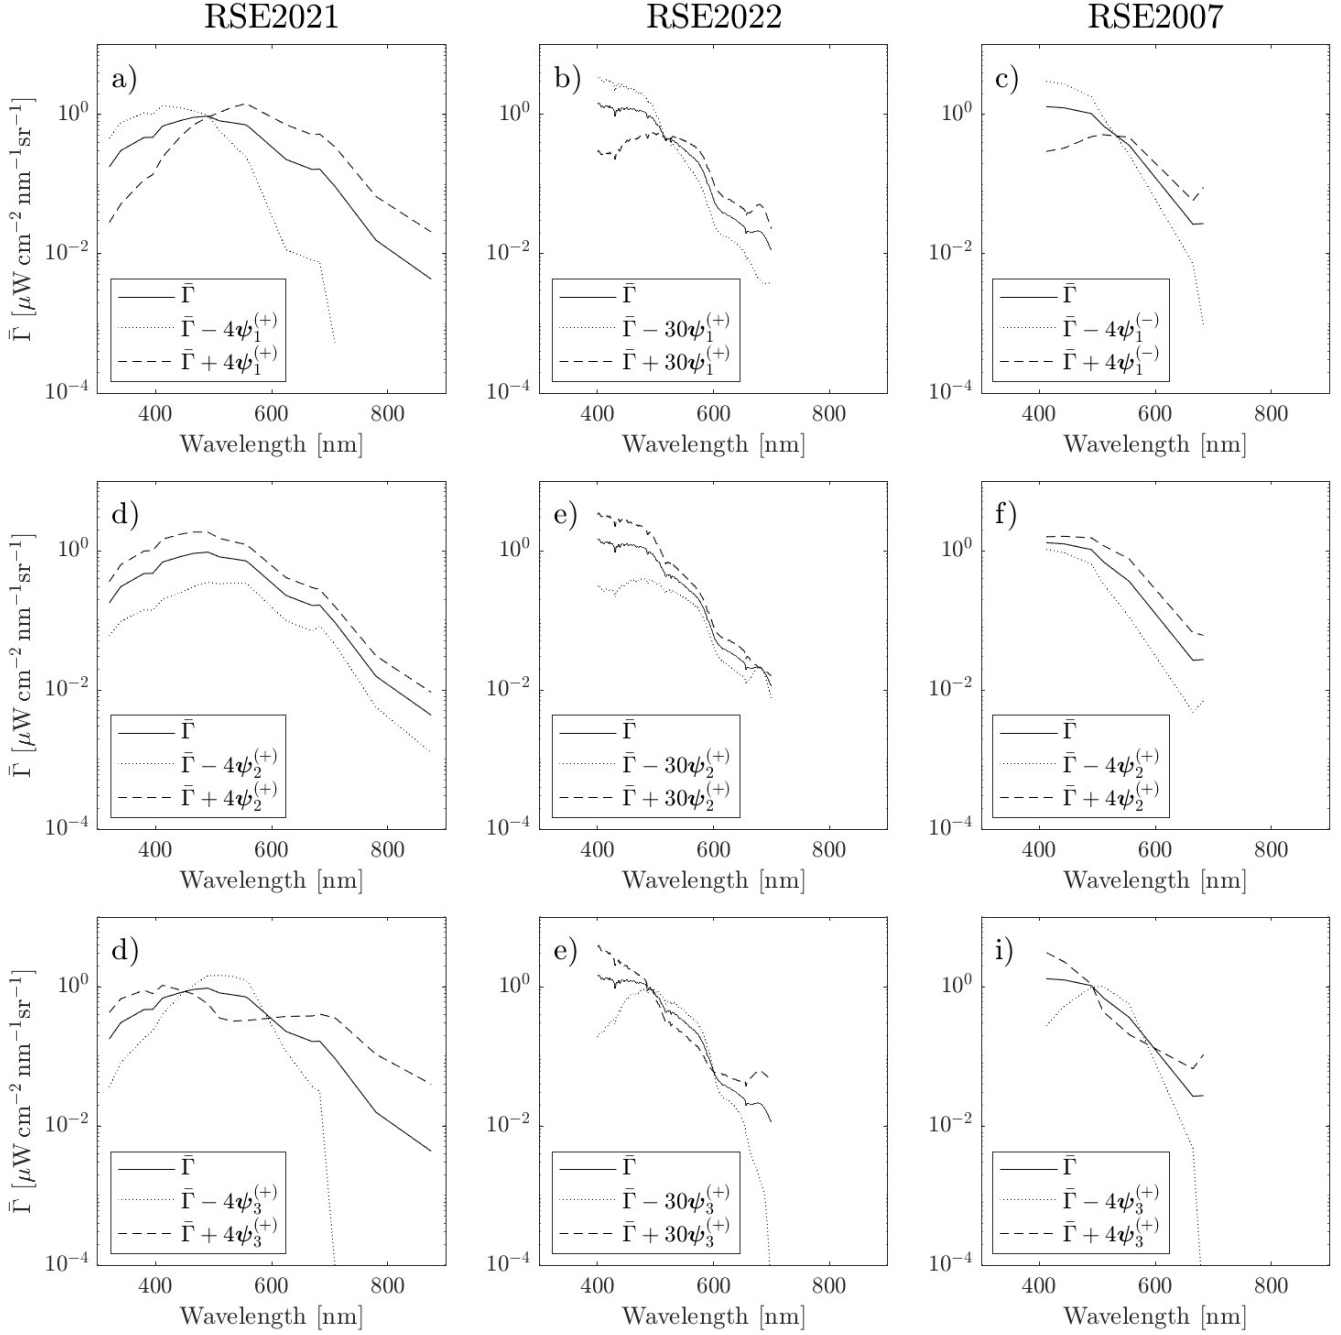

Figure S1. Mean  $[L_W(\lambda)]_N$  spectra—represented as  $\bar{\Gamma}$  for brevity following Hooker et al. 2021—are shown for each dataset as solid black lines. Reconstructed spectra are shown in dashed plus dotted lines and represent spectral modifications associated with adding or subtracting, respectively, scalar quantities derived from the eigenfunctions. Modifications associated with  $\psi_1$ ,  $\psi_2$ , and  $\psi_3$  are shown in the top, middle, and bottom rows, respectively.

**Figure S2.**

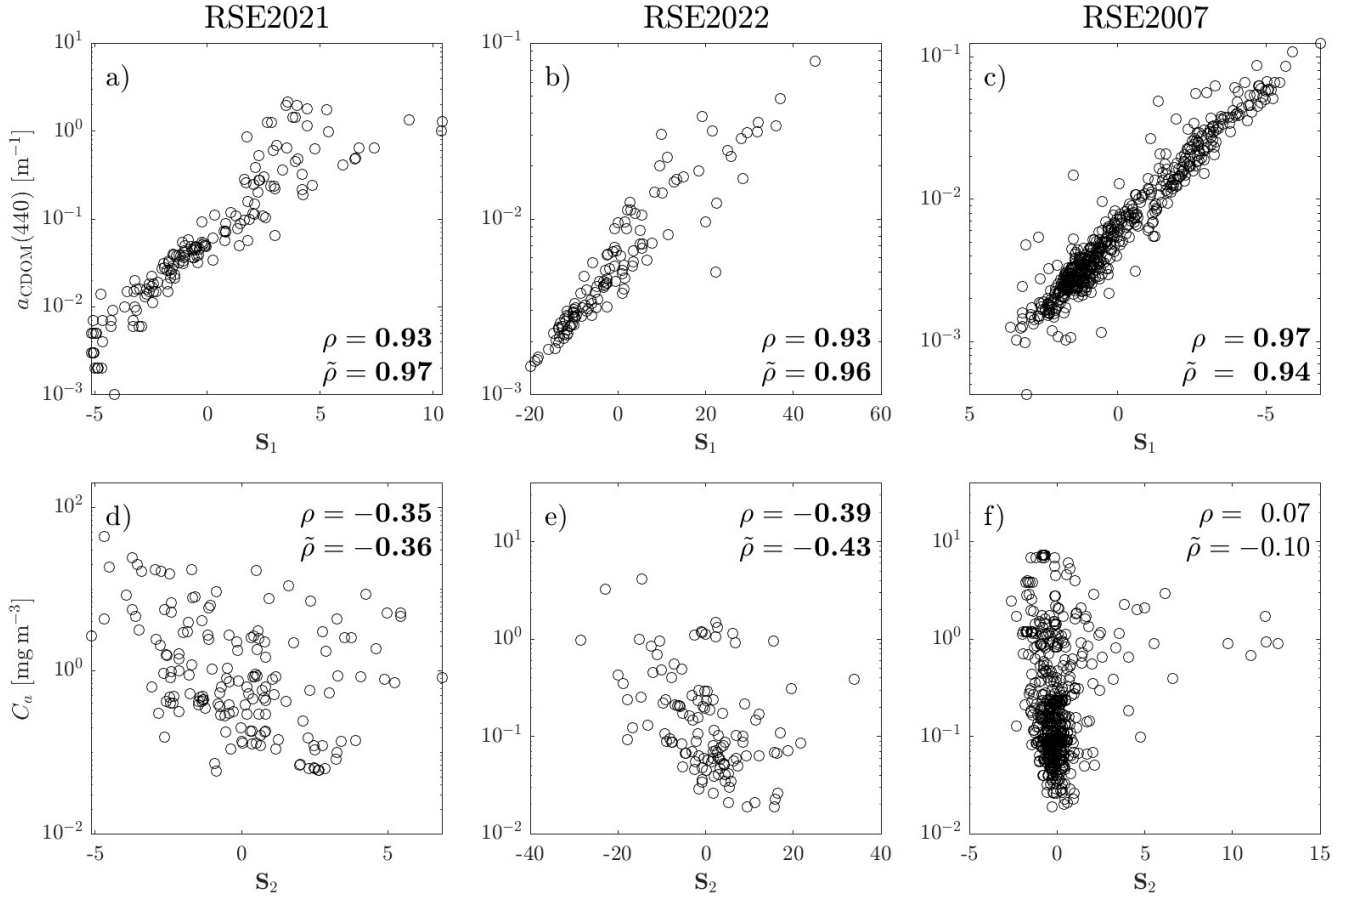

Figure S2. Relationships between the  $S_1$  (top row) and  $S_2$  (bottom row) matrix predictors to CDOM absorption (top row) and  $C_a$  values (bottom row). Pearson's ( $\rho$ ) and Spearman's ( $\tilde{\rho}$ ) correlation coefficients are overlaid, with bold type indicating significance at  $P < 0.01$ .

**Table S1.**

Table. S1. The quartile summary of biogeochemical quantities from the RSE2021, RSE2022, and RSE2007 dataset field observations, plus estimated values for  $b_{bp}(443)$  derived following Matsuoka et al. (2013) and Hooker et al. (2021). Out-of-bound values are indicated as limit of detection (LOD).

| Dataset                         | Parameter | Min    | Lower<br>Quartile | Median | Upper<br>Quartile | Max     |
|---------------------------------|-----------|--------|-------------------|--------|-------------------|---------|
| $a_{CDOM}(440)$<br>[ $m^{-1}$ ] | RSE2021   | 0.0010 | 0.0175            | 0.4550 | 0.2185            | 2.1460  |
|                                 | RSE2022   | 0.0015 | 0.0028            | 0.0044 | 0.0088            | 0.0795  |
|                                 | RSE2007   | 0.0004 | 0.0027            | 0.0040 | 0.0124            | 0.1242  |
| $C_a$<br>[ $mg\ m^{-3}$ ]       | RSE2021   | 0.0590 | 0.2925            | 0.7440 | 2.6900            | 44.1960 |
|                                 | RSE2022   | 0.0190 | 0.0580            | 0.1015 | 0.2520            | 4.1510  |
|                                 | RSE2007   | 0.0190 | 0.0780            | 0.1450 | 0.4815            | 7.3180  |
| $b_{bp}(443)$ [ $m^{-1}$ ]      | RSE2021   | LOD    | 0.0010            | 0.0050 | 0.0290            | 0.3290  |

## References

Hooker, S.B., Houskeeper, H.F., Kudela, R.M., Matsuoka, A., Suzuki, K., and Isada, T.: Spectral modes of radiometric measurements in optically complex waters. *Continental Shelf Research* 219, 104357, 2021.

Matsuoka, A., Babin, M., Doxaran, D., Hooker, S.B., Mitchell, B.G., Bélanger, S., and Bricaud, A.: A synthesis of light absorption properties of the Pan-Arctic Ocean: Application to semi-analytical estimates of dissolved organic carbon concentrations from space. *Biogeosciences Discussions* 10, no. 11, 2013.
